# Supplementary material
Source: MDPI journal article supplement (https://www.mdpi.com/search?q=nanomaterials-09-01691)
Supplement: s001 [file nanomaterials-09-01691-s001.pdf]

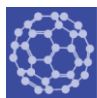

# Supplementary Information

## Fabrication and Characterization of a Metallic–Dielectric Nanorod Array by Nanosphere Lithography for Plasmonic Sensing Application

Yuan-Fong Chou Chau <sup>1</sup>, Kuan-Hung Chen <sup>2</sup>, Hai-Pang Chiang <sup>2,3,\*</sup>, Chee Ming Lim <sup>1</sup>, Hung Ji Huang <sup>4</sup>, Chih-Hsien Lai <sup>5</sup> and N. T. R. N. Kumara <sup>1</sup>

<sup>1</sup> Centre for Advanced Material and Energy Sciences, Universiti Brunei Darussalam, Tungku Link, Gadong BE1410, Negara Brunei Darussalam; chou.fong@ubd.edu.bn (Y.-F.C.C.); cheeming.lim@ubd.edu.bn (C.M.L.); roshan.kumara@ubd.edu.bn (N.T.R.N.K.)

<sup>2</sup> Department of Optoelectronics and Materials Technology, National Taiwan Ocean University, No. 2 Pei-Ning Rd., 202 Keelung, Taiwan; ethanchen74@gmail.com (K.-H.C.)

<sup>3</sup> Institute of Physics, Academia Sinica, Taipei 115, Taiwan

<sup>4</sup> Taiwan Instrument Research Institute, National Applied Research Laboratories, 300, Hsinchu, Taiwan; hjhuang@narlabs.org.tw (H.J.H.)

<sup>5</sup> Department of Electronic Engineering, National Yunlin University of Science and Technology, Yunlin, 64002, Taiwan; chlai@yuntech.edu.tw (C.-H.L.)

\* Correspondence: hpchiang@mail.ntou.edu.tw (H.-P.C.); Tel.: +886-2-24622192#6702

### 1. Comparison of different RIE/ICP-RIE etching time of PS sphere

**Table S1.** Comparison of different RIE/ICP-RIE etching time of PS sphere. The height ( $h$ ) and diameter ( $d$ ) of Si nanorod and diameter ( $d_1$ ) of PS nanosphere can be modified by changing the different RIE/ICP-RIE etching time.

| PS sphere RIE/ICP reaction time |       | RIE (3 min.) | RIE (4 min.) | RIE (5 min.) | RIE (6 min.) |
|---------------------------------|-------|--------------|--------------|--------------|--------------|
| ICP RIE (3 min.)                | $h$   | 903±45.2 nm  | 868±50.5 nm  | 878±53.8 nm  | 912±42.5 nm  |
|                                 | $d$   | 350±23.6 nm  | 300±21.4 nm  | 250±20.6 nm  | 200±18.5 nm  |
|                                 | $d_1$ | 325±26.3 nm  | 275±27.6 nm  | 215±25.6 nm  | 149±23.0 nm  |
| ICP RIE (3 min. 30 sec)         | $h$   | 969±46.8nm   | 959±34.6 nm  | 923±52.1 nm  | 946±49.3 nm  |
|                                 | $d$   | 350±30.0 nm  | 300±28.5 nm  | 250±24.2 nm  | 200±23.7 nm  |
|                                 | $d_1$ | 342±23.5 nm  | 255±18.5 nm  | 260±16.3 nm  | 159±16.8 nm  |
| ICP RIE (4 min.)                | $h$   | 1200±25.5nm  | 1030±38.4 nm | 989±49.6 nm  | 1100±53.5 nm |
|                                 | $d$   | 350±25.3 nm  | 300±23.5 nm  | 250±19.4 nm  | 200±16.3 nm  |
|                                 | $d_1$ | 341±28.3 nm  | 242±25.4 nm  | 205±23.2 nm  | 189±18.6 nm  |

### 2. Simulated absorptance spectra of the fabricated structures at different surrounding medium

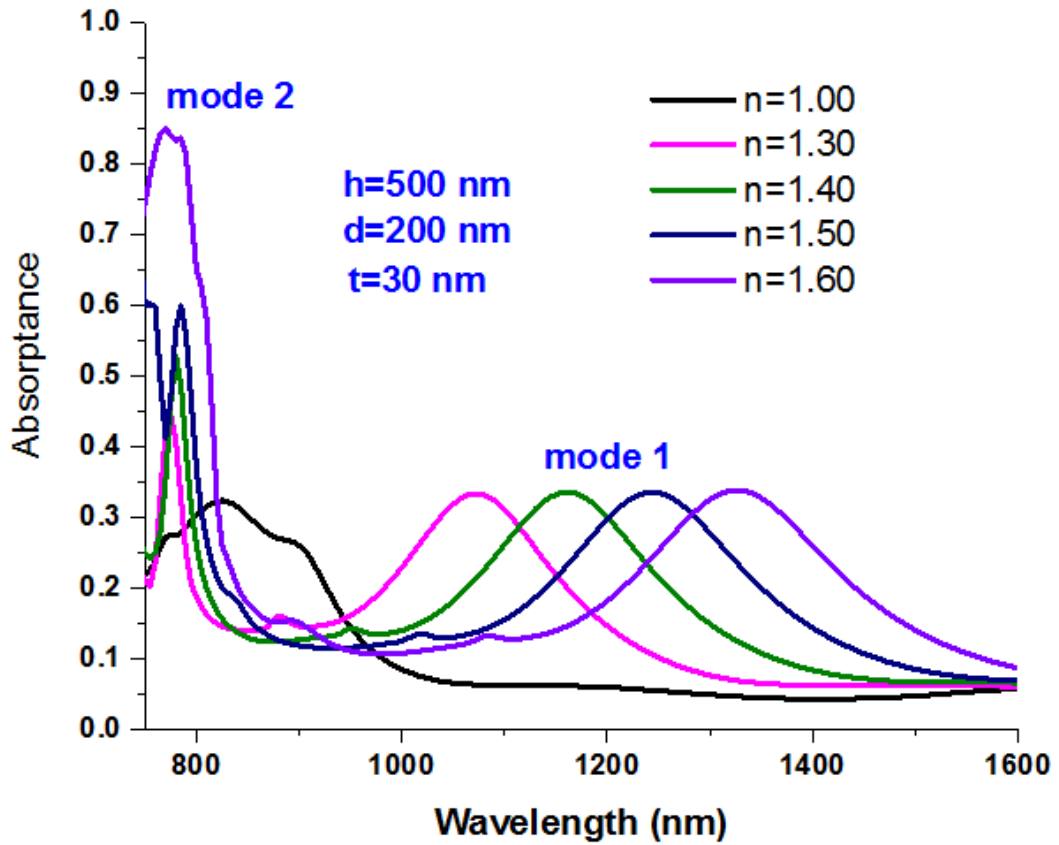

**Figure S1.** Simulated absorbance spectra of the fabricated structures at different surrounding medium (i.e.,  $n=1.0$ , 1.3, 1.4, 1.5 and 1.6). Where  $h$ ,  $d$  and  $t$  represent height and diameter of Si nanorod and thickness of Ag film, respectively.

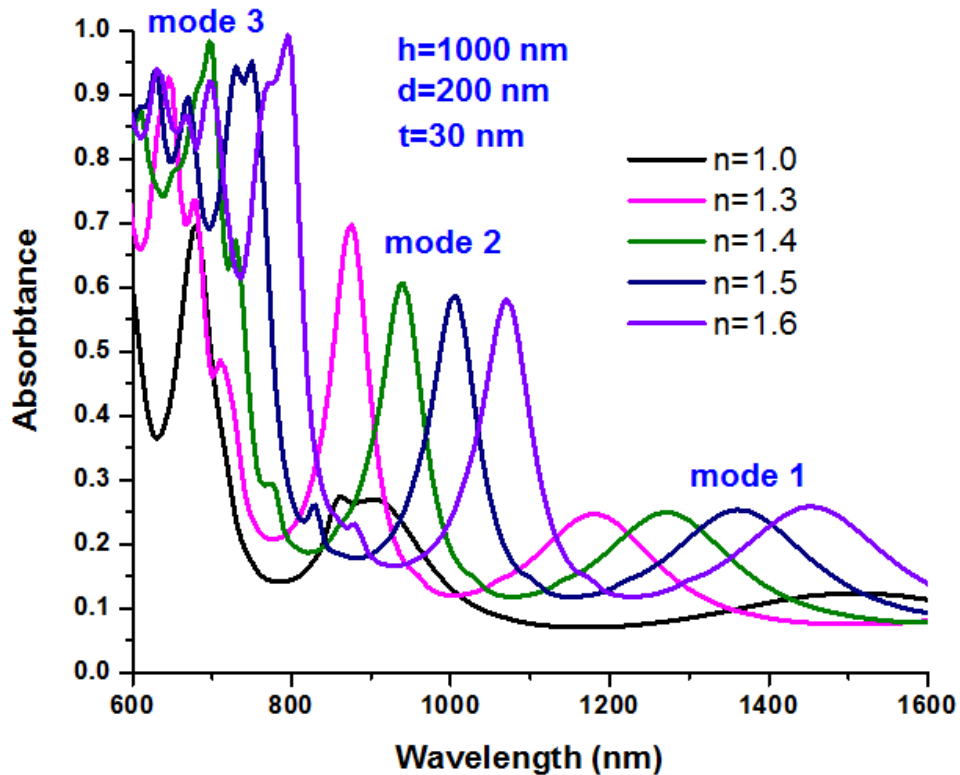

**Figure S2.** Simulated absorbance spectra of the fabricated structures at different surrounding medium (i.e.,  $n=1.0, 1.3, 1.4, 1.5$  and  $1.6$ ). Where  $h$ ,  $d$  and  $t$  represent height and diameter of Si nanorod and thickness of Ag film, respectively.

### 3. Comparison of the current plasmonic nanosensor with the reported plasmonic sensors

Table S2 Comparison of the current plasmonic nanosensor with the reported plasmonic sensors.

| Ref.      | Sensing type                         | Targeted object                        | Detection limitation | Sensitivity(S)                                        | Year |
|-----------|--------------------------------------|----------------------------------------|----------------------|-------------------------------------------------------|------|
| [9]       | Plasmonic Nanocavities               | Dispersionless material                | -                    | ~541nm/ RIU (simulation)                              | 2008 |
| [3]       | Metallic dot                         | Liquid solution                        | -                    | -                                                     | 2015 |
| [5]       | Plasmonic silver nanorods            | Liquid solution                        | RI 1.3~1.4           | 270 nm/ RIU (experiment)                              | 2011 |
| [4]       | Gold nanodisk                        | Liquid solution                        | RI 1.32~1.42         | 167-327 nm/ RIU(experiment)                           | 2011 |
| [2][13]   | Nano hole                            | Gas                                    | RI 1~1.4             | 600 nm/ RIU                                           | 2012 |
| [8]       | All-semiconductor plasmonic gratings | Dispersionless material                | -                    | ~900±20nm/ RIU                                        | 2016 |
| [6]       | Nanoplasmonic structure              | Amide I/Monomers/Fibrils and Oligomers | -                    | 220 nm/ RIU (experiment)                              | 2017 |
| [12]      | Optical fiber                        | Aqueous solutions                      | RI 1.33 ~ 1.3657     | 700.3 nm/RIU (experiment)                             | 2017 |
| [7]       | Gold nanoantenna array               | Glucose and fructose solutions         | 55 mM                | 10 g/l (experiment)                                   | 2019 |
| [10]      | Metal Dichalcogenide                 | Aqueous solutions                      | -                    | 198°C/RIU (simulation)                                | 2019 |
| [1]       | Ordered Metal Nanodot Arrays         | Liquid solution                        | -                    | 310 nm/ RIU (experiment)                              | 2019 |
| [11]      | Au nanodisk array                    | Gas                                    | RI 1~1.04            | 2262 nm/ RIU (simulation)                             | 2019 |
| This work | Ordered Metal nanorod array          | Liquid solution                        | RI 1.30 to 1.60      | 340 nm/ RIU (experiment)<br>1000 nm/ RIU (simulation) | 2019 |

### References

- Yoshino, M.; Kubota, Y.; Nakagawa, Y.; Terano, M.; Efficient Fabrication Process of Ordered Metal Nanodot Arrays for Infrared Plasmonic Sensor. *Micromachines* **2019**, *10*, 385.
- Im, H.; Sutherland, J.N.; Maynard, J.A.; Oh, S.H. Nanohole-based surface plasmon resonance instruments with improved spectral resolution quantify a broad range of antibody-ligand binding kinetics. *Anal Chem* **2012**, *84*, 1941–1947.
- Yoshino, M.; Li, Z.; Terano, M. Theoretical and experimental study of metallic dot agglomeration induced by thermal dewetting. *ASME J. Micro Nano-Manuf.* **2015**, *3*, 021004.
- Lee, S.; Lee, K.; Ahn, J.; Lee, J.; Kim, M.; Shin, Y.-B. Highly sensitive biosensing using arrays of plasmonic Au nanodisks realized by nanoimprint lithography. *ACS Nano* **2011**, *5*, 97–904.
- Jakab, A.; Rosman, C.; Khalavka, Y.; Becker, J.; Trügler, A.; Hohenester, U.; Sønnichsen, C. Highly Sensitive Plasmonic Silver Nanorods. *ACS Nano* **2011**, *5*, 6880–6885.
- Etezadi, D.; Warner, J.B.; Ruggeri, F.S.; Dietler, G.; Lashuel, H.A.; Altug, H. Nanoplasmonic mid-infrared biosensor for in vitro protein secondary structure detection. *Light Sci. Appl.* **2017**, *6*, e17029.

7. Kuhner, L.; Semenyshyn, R.; Hentschel, M.; Neubrech, F.; Tarin, C.; Giessen, H. Vibrational sensing using infrared nanoantennas: Toward the noninvasive quantitation of physiological levels of glucose and fructose. *ACS Sens.* **2019**, *4*, 1973.
8. F. B.; Barho, F. Gonzalez-Posada, M.-J. Milla-Rodrigo, M.; Bomers, L. Cerutti, and T. Taliercio, All-semiconductor plasmonic gratings for biosensing applications in the mid-infrared spectral range, *Opt. Express* **2016**, *24*, 16175.
9. Hao, F.; Sonnefraud, Y.; Dorpe, P.V.; Maier, S.A.; Halas, N.J.; Nordlander, P. Symmetry Breaking in Plasmonic Nanocavities: Subradiant LSPR Sensing and a Tunable Fano Resonance. *Nano Lett.* **2008**, *8*, 3983–3988.
10. Yi Xu, Yee Sin Ang, Lin Wu and Lay Kee Ang, High Sensitivity Surface Plasmon Resonance Sensor Based on Two-Dimensional MXene and Transition Metal Dichalcogenide: A. Theoretical Study, *Nanomaterials* **2019**, *9*, 165.
11. Alharbi, R.; Mustafa, Yavuz, M. Promote Localized Surface Plasmonic Sensor Performance via Spin-Coating Graphene Flakes over Au Nano-Disk Array. *Photonics* 2019, *6*, 57.
12. Jiang, S.; Li, Z.; Zhang, C.; Gao, S.; Li, Z.; Qiu, H.; Li, C.; Yang, C.; Mei, L.; Liu, Y. A novel U-bent plastic optical fibre local surface plasmon resonance sensor based on a graphene and silver nanoparticle hybrid structure. *J. Phys. D. Appl. Phys.* **2017**, *50*, 165105.
13. Jianga, J.; Wang, X.; Li, S.; Ding, F.; Li, N.; Meng, S.; Li, R.; Jia Qi, J.; Liu, Q.; Liu, G.L. Plasmonic nano-arrays for ultrasensitive bio-sensing. *Nanophotonics* 2018, *7*, 1517–1531.
